# Supplementary material for: A high-throughput skim-sequencing approach for genotyping, dosage estimation and identifying translocations
Source: PubMed Central journal article supplement (PMC9584886; doi:10.1038/s41598-022-19858-2), 2022-10-20

**Nextera Library Protocol for Skim-sequencing**  
v1.0 / 16 Dec 2020

Shuangye Wu and Jesse Poland  
Kansas State University

Xiaoyun Wang, Jing Wu, and Jeffrey C. Glaubitz  
Institute of Biotechnology, Cornell University

---

**DNA Concentration Requirement**

DNA: 1ul @ 1ng / ul DNA concentration is important for the Tagmentation reaction to work correctly as the enzyme concentration must be matched to the DNA amount. For the ultra-low reaction size used below, the total DNA amount is 1ng. (must be in range of 0.6 to 1.5ng/ul)

It is recommended that DNA be quantified using a fluorescence-based quantification method such as PicoGreen.

**Index Adapters (PCR primers)**

The adapters are dual index using the Illumina i7 and i5 indexing reads. The i7 index corresponds to sample (on a 96-well plate) and the i5 index corresponds to the plate (for multiplexing multiple plates together). The i7 and i5 adapters are ordered as standard oligos and should be quantified, normalized and arrayed into plates with the combined i7/i5 oligos mixed together in the respective combinations at 2.5uM each.

---

**Tagmentation reaction set up**

The tagmentation reaction will cut DNA and ligate Illumina adapters. Illumina Tagment DNA TDE1 Enzyme and Buffer Kits (catalog no. 20034197 or 20034198)

Tagment Master mix per sample

| Reagent           | per 1 Rxn (ul) |
|-------------------|----------------|
| dH2O              | 3.3964         |
| TD Buffer         | 0.504          |
| TDE1              | 0.0996         |
| <b>Master Mix</b> | <b>4</b>       |
|                   |                |
| *gDNA (1ng/ul)    | 1              |
| <b>Total</b>      | <b>5</b>       |

- for tagmentation step, mix gently in the tube
  - add 4ul of Tagment Master mix to each sample
  - incubate at 55C / 15min
  - remove plates from incubator and let them slowly cool to room temp
-

## PCR

The PCR reaction will amplify the libraries and add Illumina adapter sequences with dual index on the forward (i7) and reverse (i5) adapters. NEB Tag 2X Master Mix (catalog no. M0270L)

PCR master mix setup: (mix in 25ml reservoir)

| Reagent – 1 rxn              | per 1rxn, (ul) |
|------------------------------|----------------|
| NEB 2x Taq Master Mix        | 12.5           |
| H <sub>2</sub> O             | 5.5            |
| <b>Master Mix</b>            | <b>18</b>      |
| i7/i5 index mix (2.5uM each) | 2              |
| Tagmentation Reaction        | 5              |
| <b>total reaction</b>        | <b>25</b>      |

- add 2ul of i7/i5 index mix to respective sample wells.
- add 18 ul of PCR Master Mix to each well and mix. Proceed to PCR program

PCR program

| temperature / time | cycles |
|--------------------|--------|
| 72C / 3min         |        |
| 95C / 1min         |        |
| 95C / 10 sec       | 18x    |
| 55C / 20 sec       |        |
| 72C / 3 min        |        |
| 72C / 5 min,       |        |
| hold 4C            |        |

---

## Sample library quantification, normalizing and multiplexing, clean-up

Quantify PCR product by sample using picogreen (see PicoGreen Quantification Protocol)

Library normalization:

- normalize all samples to 15ul @ 6ng/ul (using Tecan)

Sample pooling:

- pool 5ul from each sample; combining all pooled samples across plates

Sample clean-up: using QIAquick PCR Purification Kit Catalog no. 28106 or 28104

- use 400ul from combined all pooled samples for clean up using Qiagen PCR purification kit
  - elute with 35ul of Buffer EB. NOTE: 30ul will be used for size selection (below), and the extra volume can be used for checking the original library on Experion
-

### **Library size selection**

The completed library will have a broad size range (see figure below). For optimal quantification and flow cell loading a size selection is performed. We recommend a size range of 600 – 800 bp.

Blue Pippin Selection: using 1.5% Agarose Gel Cassettes (Catalog No. BDF1510).

- Follow BluePippin Quick Guide for 1.5% Agarose Gel Cassette
- size selection set at 600 to 800 bp.
- After size selection, clean up the library using Qiagen PCR purification kit and elute with 30ul of Buffer EB.

Experion check: check the fragment distribution. (see examples below)

- Using Experion DNA 1K Reagents (Cat. #700-7164) and Experion DNA Chips (Cat. #7007163),
- following Experion DNA 1K Analysis Kit Quick Guide to load samples onto the chip

The fragment size distribution before and after selection are show in figure below.

---

### **Library Quantification**

The final library is quantified using picogreen and diluted to a suitable concentration for sequencing.

Using picogreen to quantify PCR product by sample- Use one 8 strip tube to prepare size standard (standard curve) following the concentration:

100ul @10ng/ul, 5ng/ul, 2.5ng/ul, 1.25ng/ul, 0.625ng/ul, 0.3125ng/ul, 0.15625ng/ul and 0ng/ul.  
Take 2ul from each well to use for quantification control.

Dilution is optional (depending on the requirements of the sequencing center):  
dilute to 30ul@10nM for sequencing.

**The library is now ready for sequencing!**

Example of skim-seq library before and after size selection of 600-800 bp on Blue Pippin.

BEFORE

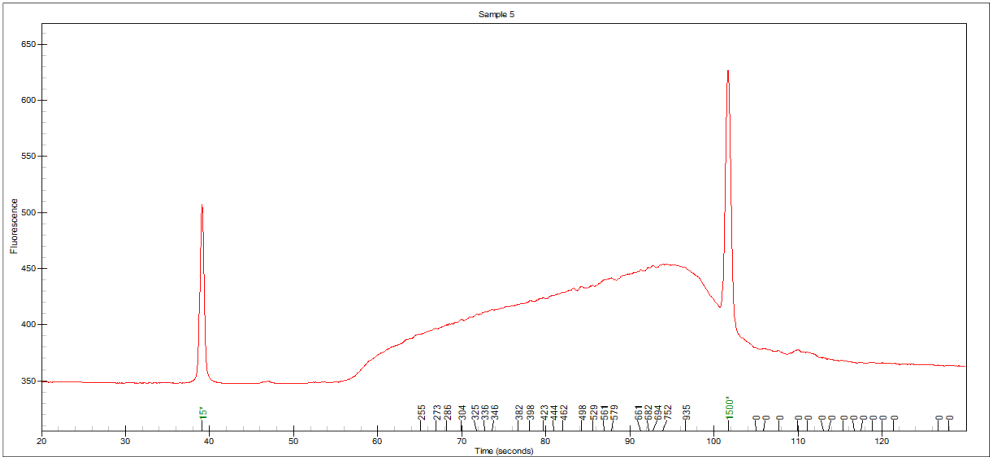

AFTER

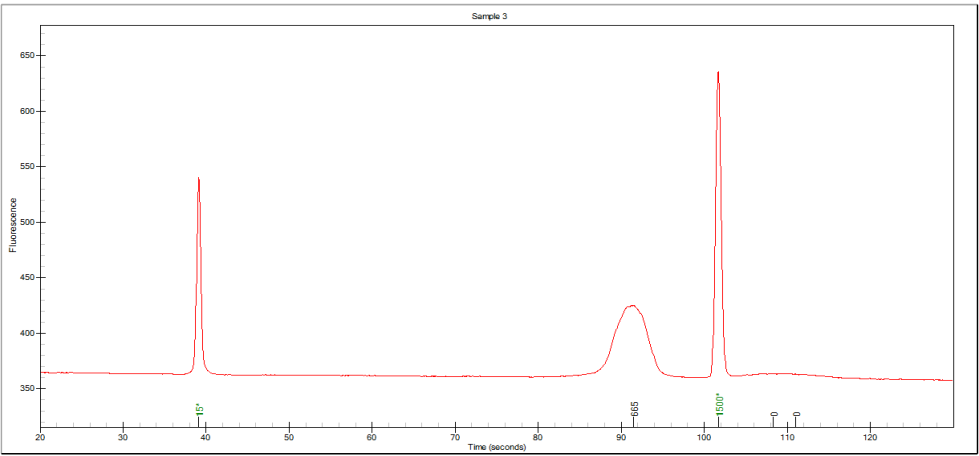

Example of size selected library:

Electropherogram Report

|                     |                            |                      |                        |
|---------------------|----------------------------|----------------------|------------------------|
| <b>Project:</b>     | 201027_TA4342-MG           | <b>Acq. Analyst:</b> | DefaultUser            |
| <b>Assay:</b>       | DNA IK                     | <b>Acq. Time:</b>    | 10/27/2020 11:58:03 AM |
| <b>Run:</b>         | Run_10-27-2020_11-58-01 AM | <b>Signature:</b>    | N/A                    |
| <b>Run Version:</b> | N/A                        |                      |                        |

Well# Ladder

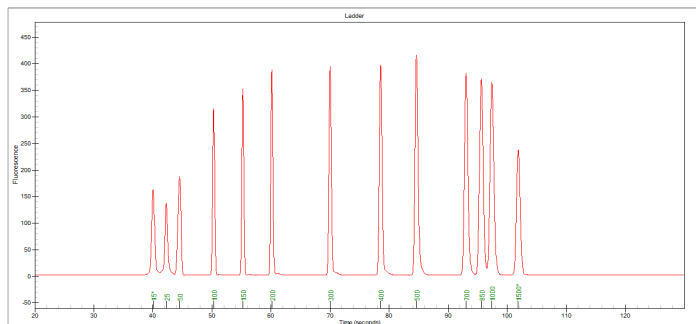

Well# 1 H21\_600-800bp

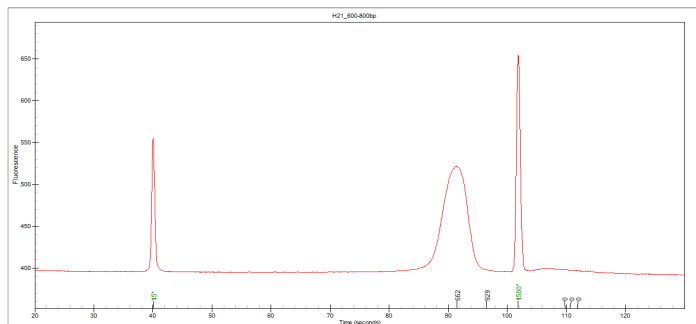

Supplement: 41598_2022_19858_MOESM13_ESM.pdf [file 41598_2022_19858_MOESM13_ESM.pdf]
