# Supplementary material for: A high-throughput skim-sequencing approach for genotyping, dosage estimation and identifying translocations
Source: PubMed Central journal article supplement (PMC9584886; doi:10.1038/s41598-022-19858-2), 2022-10-20
Supplement: 41598_2022_19858_MOESM6_ESM.pdf [file 41598_2022_19858_MOESM6_ESM.pdf]

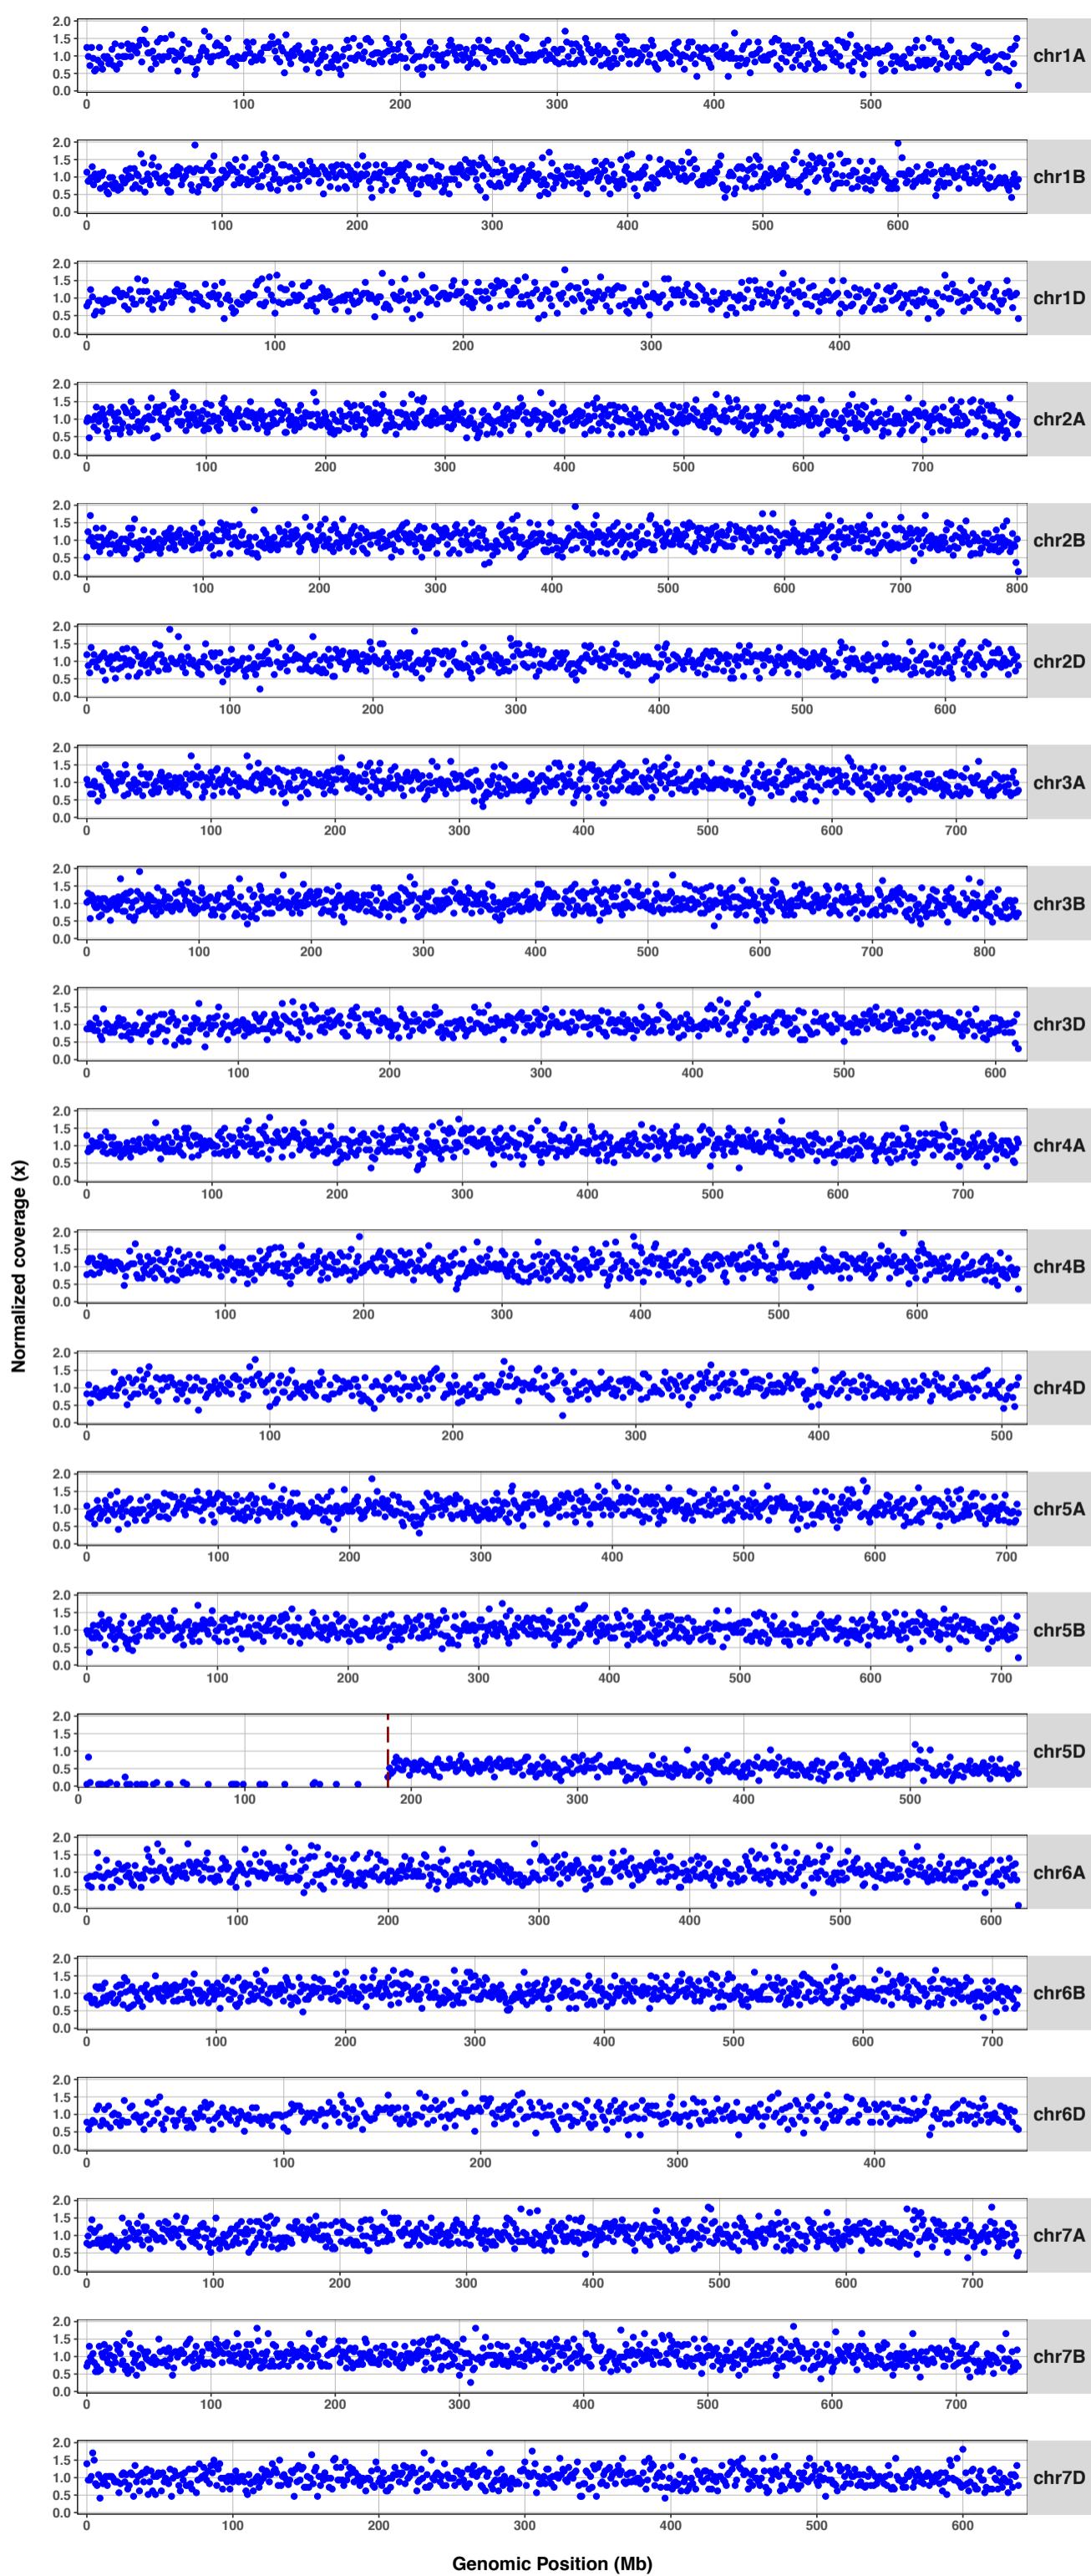

**Supplementary Figure S5.** Normalized read counts for example individual samples from CS-M5D populations showing mono-telosomic 5DL [tissue id: DNA200317P01\_C04]. The red dashed line on chr5D indicates the centromere.
