# Supplementary material for: A high-throughput skim-sequencing approach for genotyping, dosage estimation and identifying translocations
Source: PubMed Central journal article supplement (PMC9584886; doi:10.1038/s41598-022-19858-2), 2022-10-20
Supplement: 41598_2022_19858_MOESM7_ESM.pdf [file 41598_2022_19858_MOESM7_ESM.pdf]

Normalized Coverage (X)

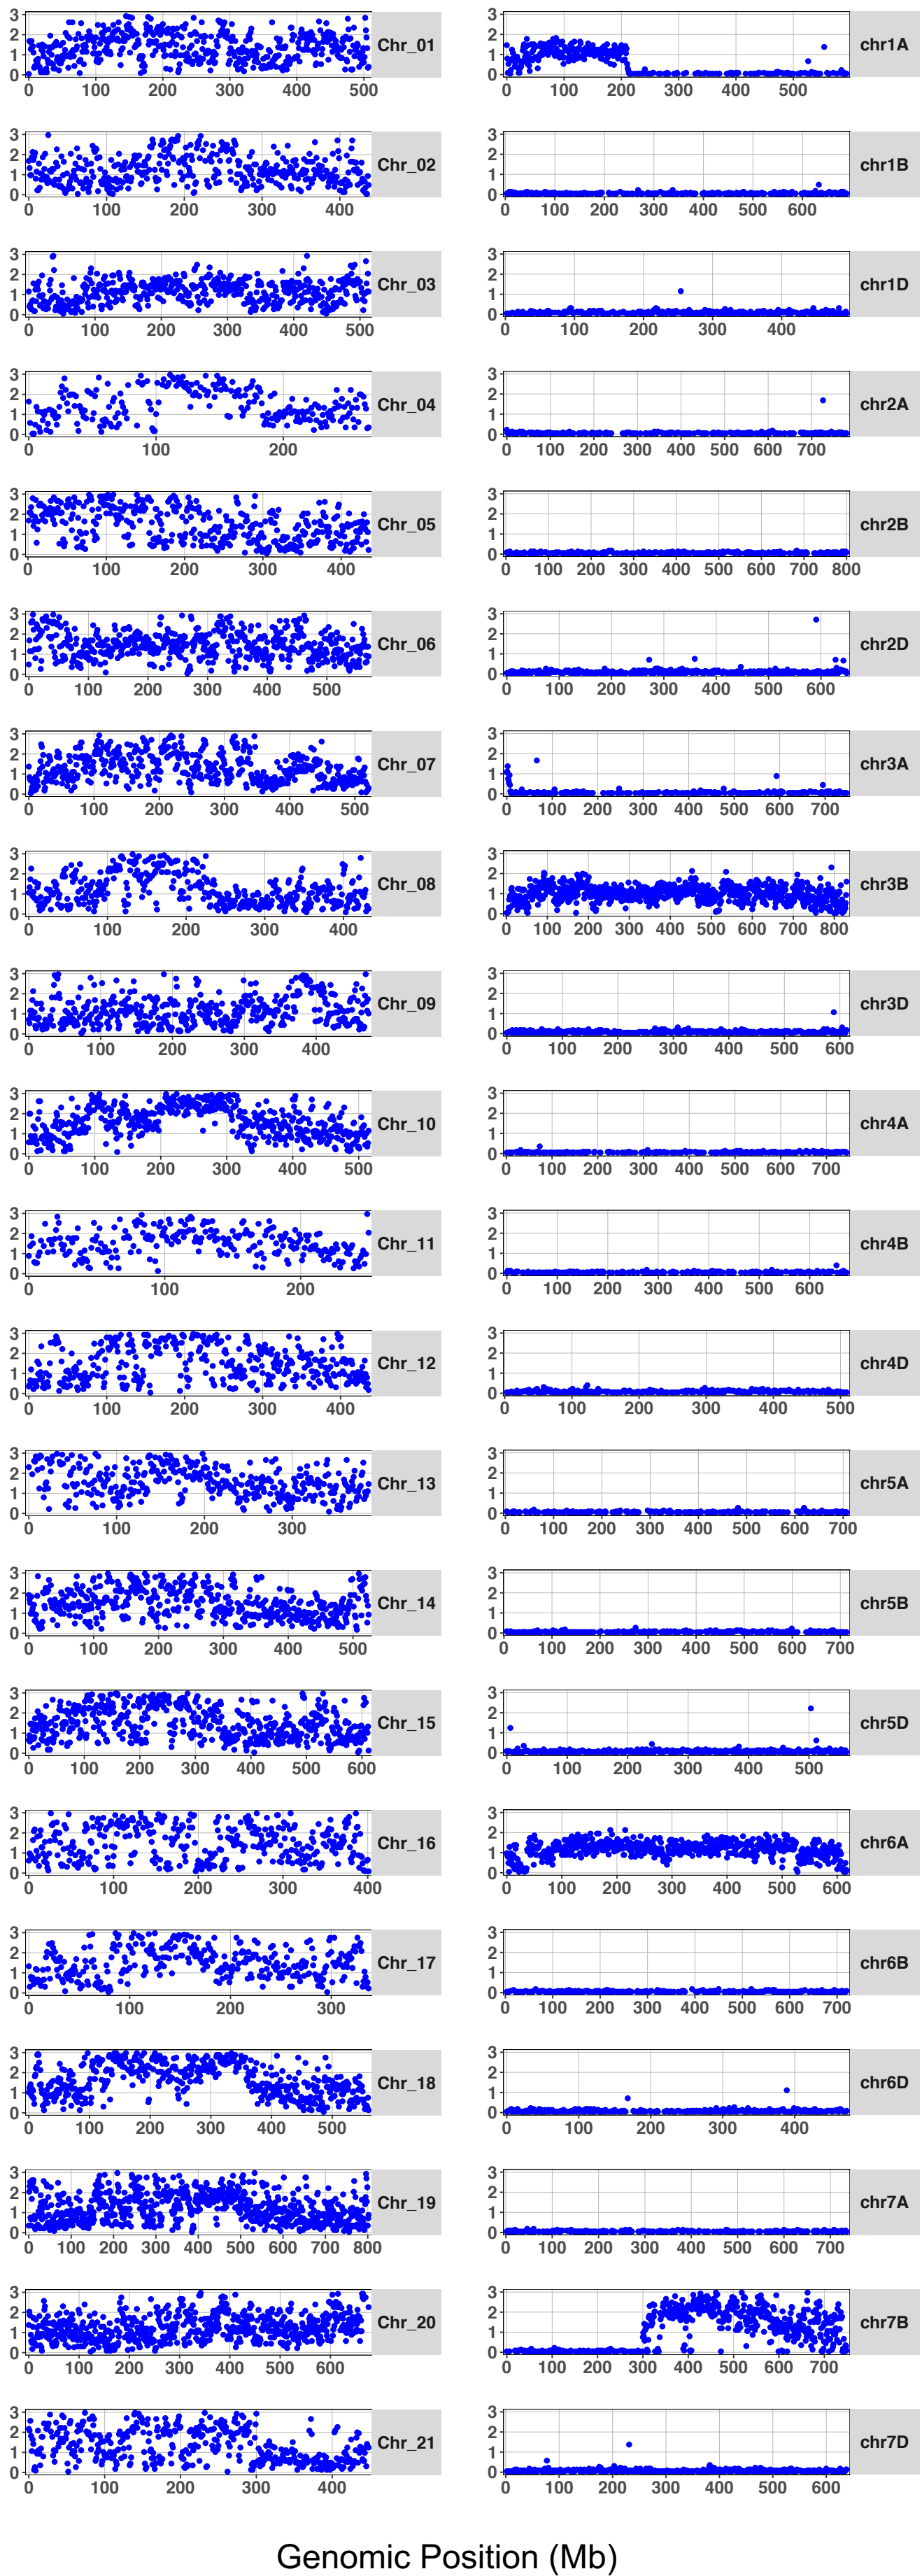

Genomic Position (Mb)

**Supplementary Figure S6.** Normalized reads per chromosome of intermediate wheatgrass containing additional wheat chromosomes (amphiploid). Intermediate wheatgrass chromosomes are labeled Chr\_01 to Chr\_21. Wheat chromosomes 3B and 6A are present in this amphiploid along with chromosomes fragments of 1A and 7B. Left panel shows intermediate wheatgrass chromosomes 1-21 whereas the right panel shows wheat chromosomes present in the sample [tissue id: 20STR000681\_DNA200507P02\_H02].
