# Supplementary material for: A high-throughput skim-sequencing approach for genotyping, dosage estimation and identifying translocations
Source: Sci Rep. 2022 Oct 20;12:17583. doi: 10.1038/s41598-022-19858-2 (PMC9584886; doi:10.1038/s41598-022-19858-2)
Supplement: Supplementary file 8 — Supplementary Information 8. [file 41598_2022_19858_MOESM8_ESM.xlsx]

## Sheet: i7 barcode
barcode	barcode_position	id_num	nextera_5prime_sequence	barcode_reverse_comp	nextera_3prime_sequence	barcode_id	oligo_sequence	well_A01	well_01A
AACCACTC	i7	-1	CAAGCAGAAGACGGCATACGAGAT	GAGTGGTT	GTCTCGTGGGCTCGG	Next-i7-01	CAAGCAGAAGACGGCATACGAGATGAGTGGTTGTCTCGTGGGCTCGG	A01	01A
AAGGCTCT	i7	-2	CAAGCAGAAGACGGCATACGAGAT	AGAGCCTT	GTCTCGTGGGCTCGG	Next-i7-02	CAAGCAGAAGACGGCATACGAGATAGAGCCTTGTCTCGTGGGCTCGG	A02	02A
AAGTGCAG	i7	-3	CAAGCAGAAGACGGCATACGAGAT	CTGCACTT	GTCTCGTGGGCTCGG	Next-i7-03	CAAGCAGAAGACGGCATACGAGATCTGCACTTGTCTCGTGGGCTCGG	A03	03A
ACACTACC	i7	-4	CAAGCAGAAGACGGCATACGAGAT	GGTAGTGT	GTCTCGTGGGCTCGG	Next-i7-04	CAAGCAGAAGACGGCATACGAGATGGTAGTGTGTCTCGTGGGCTCGG	A04	04A
ACAGTGAC	i7	-5	CAAGCAGAAGACGGCATACGAGAT	GTCACTGT	GTCTCGTGGGCTCGG	Next-i7-05	CAAGCAGAAGACGGCATACGAGATGTCACTGTGTCTCGTGGGCTCGG	A05	05A
ACCAAGCA	i7	-6	CAAGCAGAAGACGGCATACGAGAT	TGCTTGGT	GTCTCGTGGGCTCGG	Next-i7-06	CAAGCAGAAGACGGCATACGAGATTGCTTGGTGTCTCGTGGGCTCGG	A06	06A
ACGAACGA	i7	-7	CAAGCAGAAGACGGCATACGAGAT	TCGTTCGT	GTCTCGTGGGCTCGG	Next-i7-07	CAAGCAGAAGACGGCATACGAGATTCGTTCGTGTCTCGTGGGCTCGG	A07	07A
ACGGTACA	i7	-8	CAAGCAGAAGACGGCATACGAGAT	TGTACCGT	GTCTCGTGGGCTCGG	Next-i7-08	CAAGCAGAAGACGGCATACGAGATTGTACCGTGTCTCGTGGGCTCGG	A08	08A
ACTCTCCA	i7	-9	CAAGCAGAAGACGGCATACGAGAT	TGGAGAGT	GTCTCGTGGGCTCGG	Next-i7-09	CAAGCAGAAGACGGCATACGAGATTGGAGAGTGTCTCGTGGGCTCGG	A09	09A
ACTCTGAG	i7	-10	CAAGCAGAAGACGGCATACGAGAT	CTCAGAGT	GTCTCGTGGGCTCGG	Next-i7-10	CAAGCAGAAGACGGCATACGAGATCTCAGAGTGTCTCGTGGGCTCGG	A10	10A
AGAAGCCT	i7	-11	CAAGCAGAAGACGGCATACGAGAT	AGGCTTCT	GTCTCGTGGGCTCGG	Next-i7-11	CAAGCAGAAGACGGCATACGAGATAGGCTTCTGTCTCGTGGGCTCGG	A11	11A
AGAAGTGG	i7	-12	CAAGCAGAAGACGGCATACGAGAT	CCACTTCT	GTCTCGTGGGCTCGG	Next-i7-12	CAAGCAGAAGACGGCATACGAGATCCACTTCTGTCTCGTGGGCTCGG	A12	12A
AGGAACAC	i7	-13	CAAGCAGAAGACGGCATACGAGAT	GTGTTCCT	GTCTCGTGGGCTCGG	Next-i7-13	CAAGCAGAAGACGGCATACGAGATGTGTTCCTGTCTCGTGGGCTCGG	B01	01B
AGGCAATG	i7	-14	CAAGCAGAAGACGGCATACGAGAT	CATTGCCT	GTCTCGTGGGCTCGG	Next-i7-14	CAAGCAGAAGACGGCATACGAGATCATTGCCTGTCTCGTGGGCTCGG	B02	02B
AGGTAGGA	i7	-15	CAAGCAGAAGACGGCATACGAGAT	TCCTACCT	GTCTCGTGGGCTCGG	Next-i7-15	CAAGCAGAAGACGGCATACGAGATTCCTACCTGTCTCGTGGGCTCGG	B03	03B
AGGTCAAC	i7	-16	CAAGCAGAAGACGGCATACGAGAT	GTTGACCT	GTCTCGTGGGCTCGG	Next-i7-16	CAAGCAGAAGACGGCATACGAGATGTTGACCTGTCTCGTGGGCTCGG	B04	04B
AGGTGTTG	i7	-17	CAAGCAGAAGACGGCATACGAGAT	CAACACCT	GTCTCGTGGGCTCGG	Next-i7-17	CAAGCAGAAGACGGCATACGAGATCAACACCTGTCTCGTGGGCTCGG	B05	05B
AGTACACG	i7	-18	CAAGCAGAAGACGGCATACGAGAT	CGTGTACT	GTCTCGTGGGCTCGG	Next-i7-18	CAAGCAGAAGACGGCATACGAGATCGTGTACTGTCTCGTGGGCTCGG	B06	06B
AGTCAGGT	i7	-19	CAAGCAGAAGACGGCATACGAGAT	ACCTGACT	GTCTCGTGGGCTCGG	Next-i7-19	CAAGCAGAAGACGGCATACGAGATACCTGACTGTCTCGTGGGCTCGG	B07	07B
AGTGGCAA	i7	-20	CAAGCAGAAGACGGCATACGAGAT	TTGCCACT	GTCTCGTGGGCTCGG	Next-i7-20	CAAGCAGAAGACGGCATACGAGATTTGCCACTGTCTCGTGGGCTCGG	B08	08B
ATAACGCC	i7	-21	CAAGCAGAAGACGGCATACGAGAT	GGCGTTAT	GTCTCGTGGGCTCGG	Next-i7-21	CAAGCAGAAGACGGCATACGAGATGGCGTTATGTCTCGTGGGCTCGG	B09	09B
ATCGTGGT	i7	-22	CAAGCAGAAGACGGCATACGAGAT	ACCACGAT	GTCTCGTGGGCTCGG	Next-i7-22	CAAGCAGAAGACGGCATACGAGATACCACGATGTCTCGTGGGCTCGG	B10	10B
ATCTCCTG	i7	-23	CAAGCAGAAGACGGCATACGAGAT	CAGGAGAT	GTCTCGTGGGCTCGG	Next-i7-23	CAAGCAGAAGACGGCATACGAGATCAGGAGATGTCTCGTGGGCTCGG	B11	11B
ATGCCTAG	i7	-24	CAAGCAGAAGACGGCATACGAGAT	CTAGGCAT	GTCTCGTGGGCTCGG	Next-i7-24	CAAGCAGAAGACGGCATACGAGATCTAGGCATGTCTCGTGGGCTCGG	B12	12B
CACAGACT	i7	-25	CAAGCAGAAGACGGCATACGAGAT	AGTCTGTG	GTCTCGTGGGCTCGG	Next-i7-25	CAAGCAGAAGACGGCATACGAGATAGTCTGTGGTCTCGTGGGCTCGG	C01	01C
CACCAGTT	i7	-26	CAAGCAGAAGACGGCATACGAGAT	AACTGGTG	GTCTCGTGGGCTCGG	Next-i7-26	CAAGCAGAAGACGGCATACGAGATAACTGGTGGTCTCGTGGGCTCGG	C02	02C
CAGAACTG	i7	-27	CAAGCAGAAGACGGCATACGAGAT	CAGTTCTG	GTCTCGTGGGCTCGG	Next-i7-27	CAAGCAGAAGACGGCATACGAGATCAGTTCTGGTCTCGTGGGCTCGG	C03	03C
CAGGATGT	i7	-28	CAAGCAGAAGACGGCATACGAGAT	ACATCCTG	GTCTCGTGGGCTCGG	Next-i7-28	CAAGCAGAAGACGGCATACGAGATACATCCTGGTCTCGTGGGCTCGG	C04	04C
CAGGTTCA	i7	-29	CAAGCAGAAGACGGCATACGAGAT	TGAACCTG	GTCTCGTGGGCTCGG	Next-i7-29	CAAGCAGAAGACGGCATACGAGATTGAACCTGGTCTCGTGGGCTCGG	C05	05C
CATACGGA	i7	-30	CAAGCAGAAGACGGCATACGAGAT	TCCGTATG	GTCTCGTGGGCTCGG	Next-i7-30	CAAGCAGAAGACGGCATACGAGATTCCGTATGGTCTCGTGGGCTCGG	C06	06C
CATGAGCA	i7	-31	CAAGCAGAAGACGGCATACGAGAT	TGCTCATG	GTCTCGTGGGCTCGG	Next-i7-31	CAAGCAGAAGACGGCATACGAGATTGCTCATGGTCTCGTGGGCTCGG	C07	07C
CATTGACG	i7	-32	CAAGCAGAAGACGGCATACGAGAT	CGTCAATG	GTCTCGTGGGCTCGG	Next-i7-32	CAAGCAGAAGACGGCATACGAGATCGTCAATGGTCTCGTGGGCTCGG	C08	08C
CCAAGGTT	i7	-33	CAAGCAGAAGACGGCATACGAGAT	AACCTTGG	GTCTCGTGGGCTCGG	Next-i7-33	CAAGCAGAAGACGGCATACGAGATAACCTTGGGTCTCGTGGGCTCGG	C09	09C
CCAGTATC	i7	-34	CAAGCAGAAGACGGCATACGAGAT	GATACTGG	GTCTCGTGGGCTCGG	Next-i7-34	CAAGCAGAAGACGGCATACGAGATGATACTGGGTCTCGTGGGCTCGG	C10	10C
CCTCGTTA	i7	-35	CAAGCAGAAGACGGCATACGAGAT	TAACGAGG	GTCTCGTGGGCTCGG	Next-i7-35	CAAGCAGAAGACGGCATACGAGATTAACGAGGGTCTCGTGGGCTCGG	C11	11C
CCTTCCAT	i7	-36	CAAGCAGAAGACGGCATACGAGAT	ATGGAAGG	GTCTCGTGGGCTCGG	Next-i7-36	CAAGCAGAAGACGGCATACGAGATATGGAAGGGTCTCGTGGGCTCGG	C12	12C
CCTTGGAA	i7	-37	CAAGCAGAAGACGGCATACGAGAT	TTCCAAGG	GTCTCGTGGGCTCGG	Next-i7-37	CAAGCAGAAGACGGCATACGAGATTTCCAAGGGTCTCGTGGGCTCGG	D01	01D
CGAGAGAA	i7	-38	CAAGCAGAAGACGGCATACGAGAT	TTCTCTCG	GTCTCGTGGGCTCGG	Next-i7-38	CAAGCAGAAGACGGCATACGAGATTTCTCTCGGTCTCGTGGGCTCGG	D02	02D
CGATTCTG	i7	-39	CAAGCAGAAGACGGCATACGAGAT	CAGAATCG	GTCTCGTGGGCTCGG	Next-i7-39	CAAGCAGAAGACGGCATACGAGATCAGAATCGGTCTCGTGGGCTCGG	D03	03D
CGCAATGT	i7	-40	CAAGCAGAAGACGGCATACGAGAT	ACATTGCG	GTCTCGTGGGCTCGG	Next-i7-40	CAAGCAGAAGACGGCATACGAGATACATTGCGGTCTCGTGGGCTCGG	D04	04D
CGGAGTAT	i7	-41	CAAGCAGAAGACGGCATACGAGAT	ATACTCCG	GTCTCGTGGGCTCGG	Next-i7-41	CAAGCAGAAGACGGCATACGAGATATACTCCGGTCTCGTGGGCTCGG	D05	05D
CTAAGACC	i7	-42	CAAGCAGAAGACGGCATACGAGAT	GGTCTTAG	GTCTCGTGGGCTCGG	Next-i7-42	CAAGCAGAAGACGGCATACGAGATGGTCTTAGGTCTCGTGGGCTCGG	D06	06D
CTACATCC	i7	-43	CAAGCAGAAGACGGCATACGAGAT	GGATGTAG	GTCTCGTGGGCTCGG	Next-i7-43	CAAGCAGAAGACGGCATACGAGATGGATGTAGGTCTCGTGGGCTCGG	D07	07D
CTAGCTCA	i7	-44	CAAGCAGAAGACGGCATACGAGAT	TGAGCTAG	GTCTCGTGGGCTCGG	Next-i7-44	CAAGCAGAAGACGGCATACGAGATTGAGCTAGGTCTCGTGGGCTCGG	D08	08D
CTCACCAA	i7	-45	CAAGCAGAAGACGGCATACGAGAT	TTGGTGAG	GTCTCGTGGGCTCGG	Next-i7-45	CAAGCAGAAGACGGCATACGAGATTTGGTGAGGTCTCGTGGGCTCGG	D09	09D
CTCGACTT	i7	-46	CAAGCAGAAGACGGCATACGAGAT	AAGTCGAG	GTCTCGTGGGCTCGG	Next-i7-46	CAAGCAGAAGACGGCATACGAGATAAGTCGAGGTCTCGTGGGCTCGG	D10	10D
CTCTCAGA	i7	-47	CAAGCAGAAGACGGCATACGAGAT	TCTGAGAG	GTCTCGTGGGCTCGG	Next-i7-47	CAAGCAGAAGACGGCATACGAGATTCTGAGAGGTCTCGTGGGCTCGG	D11	11D
CTGCCATA	i7	-48	CAAGCAGAAGACGGCATACGAGAT	TATGGCAG	GTCTCGTGGGCTCGG	Next-i7-48	CAAGCAGAAGACGGCATACGAGATTATGGCAGGTCTCGTGGGCTCGG	D12	12D
CTTACAGC	i7	-49	CAAGCAGAAGACGGCATACGAGAT	GCTGTAAG	GTCTCGTGGGCTCGG	Next-i7-49	CAAGCAGAAGACGGCATACGAGATGCTGTAAGGTCTCGTGGGCTCGG	E01	01E
GAACCTTC	i7	-50	CAAGCAGAAGACGGCATACGAGAT	GAAGGTTC	GTCTCGTGGGCTCGG	Next-i7-50	CAAGCAGAAGACGGCATACGAGATGAAGGTTCGTCTCGTGGGCTCGG	E02	02E
GACCGATA	i7	-51	CAAGCAGAAGACGGCATACGAGAT	TATCGGTC	GTCTCGTGGGCTCGG	Next-i7-51	CAAGCAGAAGACGGCATACGAGATTATCGGTCGTCTCGTGGGCTCGG	E03	03E
GACTTGTG	i7	-52	CAAGCAGAAGACGGCATACGAGAT	CACAAGTC	GTCTCGTGGGCTCGG	Next-i7-52	CAAGCAGAAGACGGCATACGAGATCACAAGTCGTCTCGTGGGCTCGG	E04	04E
GAGCTCTA	i7	-53	CAAGCAGAAGACGGCATACGAGAT	TAGAGCTC	GTCTCGTGGGCTCGG	Next-i7-53	CAAGCAGAAGACGGCATACGAGATTAGAGCTCGTCTCGTGGGCTCGG	E05	05E
GAGTGTGT	i7	-54	CAAGCAGAAGACGGCATACGAGAT	ACACACTC	GTCTCGTGGGCTCGG	Next-i7-54	CAAGCAGAAGACGGCATACGAGATACACACTCGTCTCGTGGGCTCGG	E06	06E
GATCTTGC	i7	-55	CAAGCAGAAGACGGCATACGAGAT	GCAAGATC	GTCTCGTGGGCTCGG	Next-i7-55	CAAGCAGAAGACGGCATACGAGATGCAAGATCGTCTCGTGGGCTCGG	E07	07E
GCAGAAGA	i7	-56	CAAGCAGAAGACGGCATACGAGAT	TCTTCTGC	GTCTCGTGGGCTCGG	Next-i7-56	CAAGCAGAAGACGGCATACGAGATTCTTCTGCGTCTCGTGGGCTCGG	E08	08E
GCATAGTC	i7	-57	CAAGCAGAAGACGGCATACGAGAT	GACTATGC	GTCTCGTGGGCTCGG	Next-i7-57	CAAGCAGAAGACGGCATACGAGATGACTATGCGTCTCGTGGGCTCGG	E09	09E
GCCTATGT	i7	-58	CAAGCAGAAGACGGCATACGAGAT	ACATAGGC	GTCTCGTGGGCTCGG	Next-i7-58	CAAGCAGAAGACGGCATACGAGATACATAGGCGTCTCGTGGGCTCGG	E10	10E
GCCTTCTT	i7	-59	CAAGCAGAAGACGGCATACGAGAT	AAGAAGGC	GTCTCGTGGGCTCGG	Next-i7-59	CAAGCAGAAGACGGCATACGAGATAAGAAGGCGTCTCGTGGGCTCGG	E11	11E
GCTGAATC	i7	-60	CAAGCAGAAGACGGCATACGAGAT	GATTCAGC	GTCTCGTGGGCTCGG	Next-i7-60	CAAGCAGAAGACGGCATACGAGATGATTCAGCGTCTCGTGGGCTCGG	E12	12E
GCTGTAAG	i7	-61	CAAGCAGAAGACGGCATACGAGAT	CTTACAGC	GTCTCGTGGGCTCGG	Next-i7-61	CAAGCAGAAGACGGCATACGAGATCTTACAGCGTCTCGTGGGCTCGG	F01	01F
GGAACATG	i7	-62	CAAGCAGAAGACGGCATACGAGAT	CATGTTCC	GTCTCGTGGGCTCGG	Next-i7-62	CAAGCAGAAGACGGCATACGAGATCATGTTCCGTCTCGTGGGCTCGG	F02	02F
GGAATGTC	i7	-63	CAAGCAGAAGACGGCATACGAGAT	GACATTCC	GTCTCGTGGGCTCGG	Next-i7-63	CAAGCAGAAGACGGCATACGAGATGACATTCCGTCTCGTGGGCTCGG	F03	03F
GGCGAATA	i7	-64	CAAGCAGAAGACGGCATACGAGAT	TATTCGCC	GTCTCGTGGGCTCGG	Next-i7-64	CAAGCAGAAGACGGCATACGAGATTATTCGCCGTCTCGTGGGCTCGG	F04	04F
GGTACGAA	i7	-65	CAAGCAGAAGACGGCATACGAGAT	TTCGTACC	GTCTCGTGGGCTCGG	Next-i7-65	CAAGCAGAAGACGGCATACGAGATTTCGTACCGTCTCGTGGGCTCGG	F05	05F
GGTTAGCT	i7	-66	CAAGCAGAAGACGGCATACGAGAT	AGCTAACC	GTCTCGTGGGCTCGG	Next-i7-66	CAAGCAGAAGACGGCATACGAGATAGCTAACCGTCTCGTGGGCTCGG	F06	06F
GTAACCGA	i7	-67	CAAGCAGAAGACGGCATACGAGAT	TCGGTTAC	GTCTCGTGGGCTCGG	Next-i7-67	CAAGCAGAAGACGGCATACGAGATTCGGTTACGTCTCGTGGGCTCGG	F07	07F
GTATCGAG	i7	-68	CAAGCAGAAGACGGCATACGAGAT	CTCGATAC	GTCTCGTGGGCTCGG	Next-i7-68	CAAGCAGAAGACGGCATACGAGATCTCGATACGTCTCGTGGGCTCGG	F08	08F
GTCAACAG	i7	-69	CAAGCAGAAGACGGCATACGAGAT	CTGTTGAC	GTCTCGTGGGCTCGG	Next-i7-69	CAAGCAGAAGACGGCATACGAGATCTGTTGACGTCTCGTGGGCTCGG	F09	09F
GTCGTTAC	i7	-70	CAAGCAGAAGACGGCATACGAGAT	GTAACGAC	GTCTCGTGGGCTCGG	Next-i7-70	CAAGCAGAAGACGGCATACGAGATGTAACGACGTCTCGTGGGCTCGG	F10	10F
GTGGTATG	i7	-71	CAAGCAGAAGACGGCATACGAGAT	CATACCAC	GTCTCGTGGGCTCGG	Next-i7-71	CAAGCAGAAGACGGCATACGAGATCATACCACGTCTCGTGGGCTCGG	F11	11F
GTTAAGCG	i7	-72	CAAGCAGAAGACGGCATACGAGAT	CGCTTAAC	GTCTCGTGGGCTCGG	Next-i7-72	CAAGCAGAAGACGGCATACGAGATCGCTTAACGTCTCGTGGGCTCGG	F12	12F
GTTCCATG	i7	-73	CAAGCAGAAGACGGCATACGAGAT	CATGGAAC	GTCTCGTGGGCTCGG	Next-i7-73	CAAGCAGAAGACGGCATACGAGATCATGGAACGTCTCGTGGGCTCGG	G01	01G
TACAGAGC	i7	-74	CAAGCAGAAGACGGCATACGAGAT	GCTCTGTA	GTCTCGTGGGCTCGG	Next-i7-74	CAAGCAGAAGACGGCATACGAGATGCTCTGTAGTCTCGTGGGCTCGG	G02	02G
TACGGTCT	i7	-75	CAAGCAGAAGACGGCATACGAGAT	AGACCGTA	GTCTCGTGGGCTCGG	Next-i7-75	CAAGCAGAAGACGGCATACGAGATAGACCGTAGTCTCGTGGGCTCGG	G03	03G
TACTGCTC	i7	-76	CAAGCAGAAGACGGCATACGAGAT	GAGCAGTA	GTCTCGTGGGCTCGG	Next-i7-76	CAAGCAGAAGACGGCATACGAGATGAGCAGTAGTCTCGTGGGCTCGG	G04	04G
TAGCTTCC	i7	-77	CAAGCAGAAGACGGCATACGAGAT	GGAAGCTA	GTCTCGTGGGCTCGG	Next-i7-77	CAAGCAGAAGACGGCATACGAGATGGAAGCTAGTCTCGTGGGCTCGG	G05	05G
TATGGCAC	i7	-78	CAAGCAGAAGACGGCATACGAGAT	GTGCCATA	GTCTCGTGGGCTCGG	Next-i7-78	CAAGCAGAAGACGGCATACGAGATGTGCCATAGTCTCGTGGGCTCGG	G06	06G
TCACCTAG	i7	-79	CAAGCAGAAGACGGCATACGAGAT	CTAGGTGA	GTCTCGTGGGCTCGG	Next-i7-79	CAAGCAGAAGACGGCATACGAGATCTAGGTGAGTCTCGTGGGCTCGG	G07	07G
TCAGTAGG	i7	-80	CAAGCAGAAGACGGCATACGAGAT	CCTACTGA	GTCTCGTGGGCTCGG	Next-i7-80	CAAGCAGAAGACGGCATACGAGATCCTACTGAGTCTCGTGGGCTCGG	G08	08G
TCCTGACT	i7	-81	CAAGCAGAAGACGGCATACGAGAT	AGTCAGGA	GTCTCGTGGGCTCGG	Next-i7-81	CAAGCAGAAGACGGCATACGAGATAGTCAGGAGTCTCGTGGGCTCGG	G09	09G
TCGTGCAT	i7	-82	CAAGCAGAAGACGGCATACGAGAT	ATGCACGA	GTCTCGTGGGCTCGG	Next-i7-82	CAAGCAGAAGACGGCATACGAGATATGCACGAGTCTCGTGGGCTCGG	G10	10G
TCTAGGAG	i7	-83	CAAGCAGAAGACGGCATACGAGAT	CTCCTAGA	GTCTCGTGGGCTCGG	Next-i7-83	CAAGCAGAAGACGGCATACGAGATCTCCTAGAGTCTCGTGGGCTCGG	G11	11G
TCTGTCGT	i7	-84	CAAGCAGAAGACGGCATACGAGAT	ACGACAGA	GTCTCGTGGGCTCGG	Next-i7-84	CAAGCAGAAGACGGCATACGAGATACGACAGAGTCTCGTGGGCTCGG	G12	12G
TCTTACGG	i7	-85	CAAGCAGAAGACGGCATACGAGAT	CCGTAAGA	GTCTCGTGGGCTCGG	Next-i7-85	CAAGCAGAAGACGGCATACGAGATCCGTAAGAGTCTCGTGGGCTCGG	H01	01H
TGCCTCAA	i7	-86	CAAGCAGAAGACGGCATACGAGAT	TTGAGGCA	GTCTCGTGGGCTCGG	Next-i7-86	CAAGCAGAAGACGGCATACGAGATTTGAGGCAGTCTCGTGGGCTCGG	H02	02H
TGCTCTAC	i7	-87	CAAGCAGAAGACGGCATACGAGAT	GTAGAGCA	GTCTCGTGGGCTCGG	Next-i7-87	CAAGCAGAAGACGGCATACGAGATGTAGAGCAGTCTCGTGGGCTCGG	H03	03H
TGCTTGCT	i7	-88	CAAGCAGAAGACGGCATACGAGAT	AGCAAGCA	GTCTCGTGGGCTCGG	Next-i7-88	CAAGCAGAAGACGGCATACGAGATAGCAAGCAGTCTCGTGGGCTCGG	H04	04H
TGGCTCTT	i7	-89	CAAGCAGAAGACGGCATACGAGAT	AAGAGCCA	GTCTCGTGGGCTCGG	Next-i7-89	CAAGCAGAAGACGGCATACGAGATAAGAGCCAGTCTCGTGGGCTCGG	H05	05H
TGGTTCGA	i7	-90	CAAGCAGAAGACGGCATACGAGAT	TCGAACCA	GTCTCGTGGGCTCGG	Next-i7-90	CAAGCAGAAGACGGCATACGAGATTCGAACCAGTCTCGTGGGCTCGG	H06	06H
TTACGTGC	i7	-91	CAAGCAGAAGACGGCATACGAGAT	GCACGTAA	GTCTCGTGGGCTCGG	Next-i7-91	CAAGCAGAAGACGGCATACGAGATGCACGTAAGTCTCGTGGGCTCGG	H07	07H
TTCCAGGT	i7	-92	CAAGCAGAAGACGGCATACGAGAT	ACCTGGAA	GTCTCGTGGGCTCGG	Next-i7-92	CAAGCAGAAGACGGCATACGAGATACCTGGAAGTCTCGTGGGCTCGG	H08	08H
TTCCTCCT	i7	-93	CAAGCAGAAGACGGCATACGAGAT	AGGAGGAA	GTCTCGTGGGCTCGG	Next-i7-93	CAAGCAGAAGACGGCATACGAGATAGGAGGAAGTCTCGTGGGCTCGG	H09	09H
TTCGGCTA	i7	-94	CAAGCAGAAGACGGCATACGAGAT	TAGCCGAA	GTCTCGTGGGCTCGG	Next-i7-94	CAAGCAGAAGACGGCATACGAGATTAGCCGAAGTCTCGTGGGCTCGG	H10	10H
TTGCAACG	i7	-95	CAAGCAGAAGACGGCATACGAGAT	CGTTGCAA	GTCTCGTGGGCTCGG	Next-i7-95	CAAGCAGAAGACGGCATACGAGATCGTTGCAAGTCTCGTGGGCTCGG	H11	11H
TTGGTGCA	i7	-96	CAAGCAGAAGACGGCATACGAGAT	TGCACCAA	GTCTCGTGGGCTCGG	Next-i7-96	CAAGCAGAAGACGGCATACGAGATTGCACCAAGTCTCGTGGGCTCGG	H12	12H

## Sheet: i5 barcode
barcode	barcode_position	id_num	nextera_5prime_sequence	barcode_sequence	nextera_3prime_sequence	barcode_id	oligo_sequence	ID
AAGACTGG	i5	-1	AATGATACGGCGACCACCGAGATCTACAC	AAGACTGG	TCGTCGGCAGCGTC	Next-i5-01	AATGATACGGCGACCACCGAGATCTACACAAGACTGGTCGTCGGCAGCGTC	1
AAGGATCC	i5	-2	AATGATACGGCGACCACCGAGATCTACAC	AAGGATCC	TCGTCGGCAGCGTC	Next-i5-02	AATGATACGGCGACCACCGAGATCTACACAAGGATCCTCGTCGGCAGCGTC	2
ACGTCAAC	i5	-3	AATGATACGGCGACCACCGAGATCTACAC	ACGTCAAC	TCGTCGGCAGCGTC	Next-i5-03	AATGATACGGCGACCACCGAGATCTACACACGTCAACTCGTCGGCAGCGTC	3
ACTTCGGT	i5	-4	AATGATACGGCGACCACCGAGATCTACAC	ACTTCGGT	TCGTCGGCAGCGTC	Next-i5-04	AATGATACGGCGACCACCGAGATCTACACACTTCGGTTCGTCGGCAGCGTC	4
AGAGTTCG	i5	-5	AATGATACGGCGACCACCGAGATCTACAC	AGAGTTCG	TCGTCGGCAGCGTC	Next-i5-05	AATGATACGGCGACCACCGAGATCTACACAGAGTTCGTCGTCGGCAGCGTC	5
AGGAACGT	i5	-6	AATGATACGGCGACCACCGAGATCTACAC	AGGAACGT	TCGTCGGCAGCGTC	Next-i5-06	AATGATACGGCGACCACCGAGATCTACACAGGAACGTTCGTCGGCAGCGTC	6
AGTGGTAC	i5	-7	AATGATACGGCGACCACCGAGATCTACAC	AGTGGTAC	TCGTCGGCAGCGTC	Next-i5-07	AATGATACGGCGACCACCGAGATCTACACAGTGGTACTCGTCGGCAGCGTC	7
ATACGTGC	i5	-8	AATGATACGGCGACCACCGAGATCTACAC	ATACGTGC	TCGTCGGCAGCGTC	Next-i5-08	AATGATACGGCGACCACCGAGATCTACACATACGTGCTCGTCGGCAGCGTC	8
ATATCCGG	i5	-9	AATGATACGGCGACCACCGAGATCTACAC	ATATCCGG	TCGTCGGCAGCGTC	Next-i5-09	AATGATACGGCGACCACCGAGATCTACACATATCCGGTCGTCGGCAGCGTC	9
CACTAGTC	i5	-10	AATGATACGGCGACCACCGAGATCTACAC	CACTAGTC	TCGTCGGCAGCGTC	Next-i5-10	AATGATACGGCGACCACCGAGATCTACACCACTAGTCTCGTCGGCAGCGTC	10
CACTTCCA	i5	-11	AATGATACGGCGACCACCGAGATCTACAC	CACTTCCA	TCGTCGGCAGCGTC	Next-i5-11	AATGATACGGCGACCACCGAGATCTACACCACTTCCATCGTCGGCAGCGTC	11
CAGAACAC	i5	-12	AATGATACGGCGACCACCGAGATCTACAC	CAGAACAC	TCGTCGGCAGCGTC	Next-i5-12	AATGATACGGCGACCACCGAGATCTACACCAGAACACTCGTCGGCAGCGTC	12
CCATACTG	i5	-13	AATGATACGGCGACCACCGAGATCTACAC	CCATACTG	TCGTCGGCAGCGTC	Next-i5-13	AATGATACGGCGACCACCGAGATCTACACCCATACTGTCGTCGGCAGCGTC	13
CCTGGAAT	i5	-14	AATGATACGGCGACCACCGAGATCTACAC	CCTGGAAT	TCGTCGGCAGCGTC	Next-i5-14	AATGATACGGCGACCACCGAGATCTACACCCTGGAATTCGTCGGCAGCGTC	14
CGTGCATA	i5	-15	AATGATACGGCGACCACCGAGATCTACAC	CGTGCATA	TCGTCGGCAGCGTC	Next-i5-15	AATGATACGGCGACCACCGAGATCTACACCGTGCATATCGTCGGCAGCGTC	15
CTCACAGT	i5	-16	AATGATACGGCGACCACCGAGATCTACAC	CTCACAGT	TCGTCGGCAGCGTC	Next-i5-16	AATGATACGGCGACCACCGAGATCTACACCTCACAGTTCGTCGGCAGCGTC	16
CTGGTTCA	i5	-17	AATGATACGGCGACCACCGAGATCTACAC	CTGGTTCA	TCGTCGGCAGCGTC	Next-i5-17	AATGATACGGCGACCACCGAGATCTACACCTGGTTCATCGTCGGCAGCGTC	17
CTTCTCGA	i5	-18	AATGATACGGCGACCACCGAGATCTACAC	CTTCTCGA	TCGTCGGCAGCGTC	Next-i5-18	AATGATACGGCGACCACCGAGATCTACACCTTCTCGATCGTCGGCAGCGTC	18
GAATCACG	i5	-19	AATGATACGGCGACCACCGAGATCTACAC	GAATCACG	TCGTCGGCAGCGTC	Next-i5-19	AATGATACGGCGACCACCGAGATCTACACGAATCACGTCGTCGGCAGCGTC	19
GATCGGTA	i5	-20	AATGATACGGCGACCACCGAGATCTACAC	GATCGGTA	TCGTCGGCAGCGTC	Next-i5-20	AATGATACGGCGACCACCGAGATCTACACGATCGGTATCGTCGGCAGCGTC	20
GCAAGCAA	i5	-21	AATGATACGGCGACCACCGAGATCTACAC	GCAAGCAA	TCGTCGGCAGCGTC	Next-i5-21	AATGATACGGCGACCACCGAGATCTACACGCAAGCAATCGTCGGCAGCGTC	21
GGACGTAT	i5	-22	AATGATACGGCGACCACCGAGATCTACAC	GGACGTAT	TCGTCGGCAGCGTC	Next-i5-22	AATGATACGGCGACCACCGAGATCTACACGGACGTATTCGTCGGCAGCGTC	22
GGCAATCT	i5	-23	AATGATACGGCGACCACCGAGATCTACAC	GGCAATCT	TCGTCGGCAGCGTC	Next-i5-23	AATGATACGGCGACCACCGAGATCTACACGGCAATCTTCGTCGGCAGCGTC	23
GGTCTACA	i5	-24	AATGATACGGCGACCACCGAGATCTACAC	GGTCTACA	TCGTCGGCAGCGTC	Next-i5-24	AATGATACGGCGACCACCGAGATCTACACGGTCTACATCGTCGGCAGCGTC	24
GTCAGAAC	i5	-25	AATGATACGGCGACCACCGAGATCTACAC	GTCAGAAC	TCGTCGGCAGCGTC	Next-i5-25	AATGATACGGCGACCACCGAGATCTACACGTCAGAACTCGTCGGCAGCGTC	25
TCCGTAGT	i5	-26	AATGATACGGCGACCACCGAGATCTACAC	TCCGTAGT	TCGTCGGCAGCGTC	Next-i5-26	AATGATACGGCGACCACCGAGATCTACACTCCGTAGTTCGTCGGCAGCGTC	26
TCGAACCA	i5	-27	AATGATACGGCGACCACCGAGATCTACAC	TCGAACCA	TCGTCGGCAGCGTC	Next-i5-27	AATGATACGGCGACCACCGAGATCTACACTCGAACCATCGTCGGCAGCGTC	27
TCGCATTC	i5	-28	AATGATACGGCGACCACCGAGATCTACAC	TCGCATTC	TCGTCGGCAGCGTC	Next-i5-28	AATGATACGGCGACCACCGAGATCTACACTCGCATTCTCGTCGGCAGCGTC	28
TGTCAGTG	i5	-29	AATGATACGGCGACCACCGAGATCTACAC	TGTCAGTG	TCGTCGGCAGCGTC	Next-i5-29	AATGATACGGCGACCACCGAGATCTACACTGTCAGTGTCGTCGGCAGCGTC	29
TGTGTGCT	i5	-30	AATGATACGGCGACCACCGAGATCTACAC	TGTGTGCT	TCGTCGGCAGCGTC	Next-i5-30	AATGATACGGCGACCACCGAGATCTACACTGTGTGCTTCGTCGGCAGCGTC	30
TTCTGAGG	i5	-31	AATGATACGGCGACCACCGAGATCTACAC	TTCTGAGG	TCGTCGGCAGCGTC	Next-i5-31	AATGATACGGCGACCACCGAGATCTACACTTCTGAGGTCGTCGGCAGCGTC	31
TTGCGGAA	i5	-32	AATGATACGGCGACCACCGAGATCTACAC	TTGCGGAA	TCGTCGGCAGCGTC	Next-i5-32	AATGATACGGCGACCACCGAGATCTACACTTGCGGAATCGTCGGCAGCGTC	32
