# Supplementary material for: A high-throughput skim-sequencing approach for genotyping, dosage estimation and identifying translocations
Source: Sci Rep. 2022 Oct 20;12:17583. doi: 10.1038/s41598-022-19858-2 (PMC9584886; doi:10.1038/s41598-022-19858-2)
Supplement: Supplementary file 9 — Supplementary Information 9. [file 41598_2022_19858_MOESM9_ESM.xlsx]

## Sheet: hisat2_hisat2_48_filtered_align
Sample Name	Total PE Reads	Overall Alignment (%)	Concordant Unique Alignment	Concordant Unique Alignment (%)	Raw Coverage	Concordant Unique Coverage
CDC Stanley	296762134	91.65	228408771	76.97	10.8894	8.3812
CDC Landmark	269672254	95.45	224823473	83.37	9.89534	8.2497
StanleyLandmarkDH01002-0	43653528	94.93	37584222	86.1	0.907	0.727
StanleyLandmarkDH01003-0	29507276	94.62	25331678	85.85	0.613	0.49
StanleyLandmarkDH01011-0	36897016	95.26	31978326	86.67	0.766	0.619
StanleyLandmarkDH01018-0	43828134	95.79	38241836	87.25	0.91	0.74
StanleyLandmarkDH01021-0	45577638	94.84	39119418	85.83	0.947	0.757
StanleyLandmarkDH01027-0	41807618	95.39	36288288	86.8	0.868	0.702
StanleyLandmarkDH01029-0	39825388	95.42	34527180	86.7	0.827	0.668
StanleyLandmarkDH01031-0	41669642	95.37	36211106	86.9	0.865	0.701
StanleyLandmarkDH01035-0	38316660	94.33	32825394	85.67	0.796	0.635
StanleyLandmarkDH01036-0	36261138	93.99	30726390	84.74	0.753	0.595
StanleyLandmarkDH01037-0	30350714	94.43	26073212	85.91	0.63	0.505
StanleyLandmarkDH01038-0	41495622	94	35183532	84.79	0.862	0.681
StanleyLandmarkDH01052-0	31445024	95.36	27331094	86.92	0.653	0.529
StanleyLandmarkDH01053-0	37549644	95.16	32508056	86.57	0.78	0.629
StanleyLandmarkDH01056-0	45443378	95.25	39365750	86.63	0.944	0.762
StanleyLandmarkDH01058-0	51875228	95.71	45199366	87.13	1.077	0.875
StanleyLandmarkDH01060-0	56694398	95	48829488	86.13	1.178	0.945
StanleyLandmarkDH01061-0	53801666	93.91	45434216	84.45	1.117	0.879
StanleyLandmarkDH01062-0	39899792	93.61	33684890	84.42	0.829	0.652
StanleyLandmarkDH01063-0	35222520	94.52	30340264	86.14	0.732	0.587
StanleyLandmarkDH01064-0	56360440	94.15	47735996	84.7	1.171	0.924
StanleyLandmarkDH01065-0	52242462	95.11	45112974	86.35	1.085	0.873
StanleyLandmarkDH01067-0	59207000	94.87	50976226	86.1	1.23	0.987
StanleyLandmarkDH01068-0	55021824	95.12	47180480	85.75	1.143	0.913
StanleyLandmarkDH01069-0	45135336	95.17	38987016	86.38	0.937	0.755
StanleyLandmarkDH01070-0	39063148	94.1	33331736	85.33	0.811	0.645
StanleyLandmarkDH01072-0	38769648	92.58	31747354	81.89	0.805	0.614
StanleyLandmarkDH01076-0	38974430	94.6	33525886	86.02	0.81	0.649
StanleyLandmarkDH01082-0	36789022	94.06	31156090	84.69	0.764	0.603
StanleyLandmarkDH01083-0	39322206	94.99	33908330	86.23	0.817	0.656
StanleyLandmarkDH01092-0	44947370	95.1	38847910	86.43	0.934	0.752
StanleyLandmarkDH01093-0	44726282	95.16	38610574	86.33	0.929	0.747
StanleyLandmarkDH01095-0	38450272	94.8	33164968	86.25	0.799	0.642
StanleyLandmarkDH01097-0	36655542	92.21	29955346	81.72	0.761	0.58
StanleyLandmarkDH01099-0	30626306	92.21	25161570	82.16	0.636	0.487
StanleyLandmarkDH01100-0	36981918	94.49	31861914	86.16	0.768	0.617
StanleyLandmarkDH01103-0	33643928	94.48	29009512	86.23	0.699	0.561
StanleyLandmarkDH01106-0	38324822	94.5	32944022	85.96	0.796	0.638
StanleyLandmarkDH01108-0	45946196	93.95	38863452	84.58	0.954	0.752
StanleyLandmarkDH01111-0	40324084	94.24	34304390	85.07	0.838	0.664
StanleyLandmarkDH02001-0	43370312	95.1	37489586	86.44	0.901	0.726
StanleyLandmarkDH02007-0	44224482	94.16	37552372	84.91	0.919	0.727
StanleyLandmarkDH02008-0	38386160	94.28	32762750	85.35	0.797	0.634
StanleyLandmarkDH02009-0	43189016	94.68	37145856	86.01	0.897	0.719
StanleyLandmarkDH02014-0	49307410	93.42	41331304	83.82	1.024	0.8
StanleyLandmarkDH02017-0	46392050	94.11	39040288	84.15	0.964	0.756
StanleyLandmarkDH02024-0	44967682	94.44	38562794	85.76	0.934	0.746
StanleyLandmarkDH02045-0	57425658	94.8	49381684	85.99	1.193	0.956
		94.5369			0.882708
