# Supplementary material for: A high-throughput skim-sequencing approach for genotyping, dosage estimation and identifying translocations
Source: Sci Rep. 2022 Oct 20;12:17583. doi: 10.1038/s41598-022-19858-2 (PMC9584886; doi:10.1038/s41598-022-19858-2)
Supplement: Supplementary file 10 — Supplementary Information 10. [file 41598_2022_19858_MOESM10_ESM.xlsx]

## Sheet: hisat2_hisat2_48_0.1x_alignment
Sample Name	Total PE Reads	Overall Alignment (%)	Concordant Unique Alignment	Concordant Unique Alignment (%)	Raw Coverage	Concordant Unique Coverage	Read Length
StanleyLandmarkDH01002-0	4814601	94.94	4145706	86.11	0.1	0.08	150
StanleyLandmarkDH01003-0	4814601	94.62	4133151	85.85	0.1	0.08	150
StanleyLandmarkDH01011-0	4814601	95.27	4173028	86.67	0.1	0.081	150
StanleyLandmarkDH01018-0	4814601	95.79	4201585	87.27	0.1	0.081	150
StanleyLandmarkDH01021-0	4814601	94.86	4133751	85.86	0.1	0.08	150
StanleyLandmarkDH01027-0	4814601	95.39	4179615	86.81	0.1	0.081	150
StanleyLandmarkDH01029-0	4814601	95.43	4174189	86.7	0.1	0.081	150
StanleyLandmarkDH01031-0	4814601	95.38	4184071	86.9	0.1	0.081	150
StanleyLandmarkDH01035-0	4814601	94.31	4123274	85.64	0.1	0.08	150
StanleyLandmarkDH01036-0	4814601	93.98	4078556	84.71	0.1	0.079	150
StanleyLandmarkDH01037-0	4814601	94.43	4135245	85.89	0.1	0.08	150
StanleyLandmarkDH01038-0	4814601	94	4081455	84.77	0.1	0.079	150
StanleyLandmarkDH01052-0	4814601	95.36	4183991	86.9	0.1	0.081	150
StanleyLandmarkDH01053-0	4814601	95.16	4167963	86.57	0.1	0.081	150
StanleyLandmarkDH01056-0	4814601	95.26	4170641	86.62	0.1	0.081	150
StanleyLandmarkDH01058-0	4814601	95.71	4195517	87.14	0.1	0.081	150
StanleyLandmarkDH01060-0	4814601	95	4146820	86.13	0.1	0.08	150
StanleyLandmarkDH01061-0	4814601	93.92	4066874	84.47	0.1	0.079	150
StanleyLandmarkDH01062-0	4814601	93.6	4063949	84.41	0.1	0.079	150
StanleyLandmarkDH01063-0	4814601	94.52	4148041	86.16	0.1	0.08	150
StanleyLandmarkDH01064-0	4814601	94.16	4078584	84.71	0.1	0.079	150
StanleyLandmarkDH01065-0	4814601	95.11	4157763	86.36	0.1	0.08	150
StanleyLandmarkDH01067-0	4814601	94.88	4146141	86.12	0.1	0.08	150
StanleyLandmarkDH01068-0	4814601	95.13	4129102	85.76	0.1	0.08	150
StanleyLandmarkDH01069-0	4814601	95.17	4159015	86.38	0.1	0.08	150
StanleyLandmarkDH01070-0	4814601	94.09	4107669	85.32	0.1	0.08	150
StanleyLandmarkDH01072-0	4814601	92.59	3942944	81.9	0.1	0.076	150
StanleyLandmarkDH01076-0	4814601	94.6	4141219	86.01	0.1	0.08	150
StanleyLandmarkDH01082-0	4814601	94.06	4077712	84.69	0.1	0.079	150
StanleyLandmarkDH01083-0	4814601	95	4152773	86.25	0.1	0.08	150
StanleyLandmarkDH01092-0	4814601	95.08	4158534	86.37	0.1	0.08	150
StanleyLandmarkDH01093-0	4814601	95.16	4156747	86.34	0.1	0.08	150
StanleyLandmarkDH01095-0	4814601	94.81	4153329	86.27	0.1	0.08	150
StanleyLandmarkDH01097-0	4814601	92.2	3933323	81.7	0.1	0.076	150
StanleyLandmarkDH01099-0	4814601	92.21	3955955	82.17	0.1	0.077	150
StanleyLandmarkDH01100-0	4814601	94.5	4148856	86.17	0.1	0.08	150
StanleyLandmarkDH01103-0	4814601	94.47	4150645	86.21	0.1	0.08	150
StanleyLandmarkDH01106-0	4814601	94.49	4139053	85.97	0.1	0.08	150
StanleyLandmarkDH01108-0	4814601	93.95	4072306	84.58	0.1	0.079	150
StanleyLandmarkDH01111-0	4814601	94.24	4095924	85.07	0.1	0.079	150
StanleyLandmarkDH02001-0	4814601	95.09	4160379	86.41	0.1	0.081	150
StanleyLandmarkDH02007-0	4814601	94.16	4088524	84.92	0.1	0.079	150
StanleyLandmarkDH02008-0	4814601	94.29	4109280	85.35	0.1	0.08	150
StanleyLandmarkDH02009-0	4814601	94.69	4140723	86	0.1	0.08	150
StanleyLandmarkDH02014-0	4814601	93.42	4035623	83.82	0.1	0.078	150
StanleyLandmarkDH02017-0	4814601	94.11	4051841	84.16	0.1	0.078	150
StanleyLandmarkDH02024-0	4814601	94.44	4128847	85.76	0.1	0.08	150
StanleyLandmarkDH02045-0	4814601	94.81	4139934	85.99	0.1	0.08	150
StanleyLandmarkDH01002-0	2407300	94.94	2072192	86.08	0.05	0.04	150
StanleyLandmarkDH01003-0	2407300	94.61	2065595	85.81	0.05	0.04	150
StanleyLandmarkDH01011-0	2407300	95.26	2086325	86.67	0.05	0.04	150
StanleyLandmarkDH01018-0	2407300	95.78	2100356	87.25	0.05	0.041	150
StanleyLandmarkDH01021-0	2407300	94.84	2067374	85.88	0.05	0.04	150
StanleyLandmarkDH01027-0	2407300	95.4	2090576	86.84	0.05	0.04	150
StanleyLandmarkDH01029-0	2407300	95.41	2087182	86.7	0.05	0.04	150
StanleyLandmarkDH01031-0	2407300	95.36	2092256	86.91	0.05	0.04	150
StanleyLandmarkDH01035-0	2407300	94.36	2062509	85.68	0.05	0.04	150
StanleyLandmarkDH01036-0	2407300	93.99	2039613	84.73	0.05	0.039	150
StanleyLandmarkDH01037-0	2407300	94.46	2068459	85.92	0.05	0.04	150
StanleyLandmarkDH01038-0	2407300	93.98	2040299	84.75	0.05	0.039	150
StanleyLandmarkDH01052-0	2407300	95.37	2092737	86.93	0.05	0.041	150
StanleyLandmarkDH01053-0	2407300	95.15	2083863	86.56	0.05	0.04	150
StanleyLandmarkDH01056-0	2407300	95.26	2085898	86.65	0.05	0.04	150
StanleyLandmarkDH01058-0	2407300	95.71	2097238	87.12	0.05	0.041	150
StanleyLandmarkDH01060-0	2407300	95.01	2073649	86.14	0.05	0.04	150
StanleyLandmarkDH01061-0	2407300	93.9	2032514	84.43	0.05	0.039	150
StanleyLandmarkDH01062-0	2407300	93.61	2032555	84.43	0.05	0.039	150
StanleyLandmarkDH01063-0	2407300	94.53	2073781	86.15	0.05	0.04	150
StanleyLandmarkDH01064-0	2407300	94.15	2038188	84.67	0.05	0.039	150
StanleyLandmarkDH01065-0	2407300	95.11	2078448	86.34	0.05	0.04	150
StanleyLandmarkDH01067-0	2407300	94.88	2073343	86.13	0.05	0.04	150
StanleyLandmarkDH01068-0	2407300	95.11	2063785	85.73	0.05	0.04	150
StanleyLandmarkDH01069-0	2407300	95.18	2079797	86.4	0.05	0.04	150
StanleyLandmarkDH01070-0	2407300	94.12	2054935	85.36	0.05	0.04	150
StanleyLandmarkDH01072-0	2407300	92.57	1970567	81.86	0.05	0.038	150
StanleyLandmarkDH01076-0	2407300	94.6	2071407	86.05	0.05	0.04	150
StanleyLandmarkDH01082-0	2407300	94.04	2038034	84.66	0.05	0.039	150
StanleyLandmarkDH01083-0	2407300	94.98	2075386	86.21	0.05	0.04	150
StanleyLandmarkDH01092-0	2407300	95.11	2080556	86.43	0.05	0.04	150
StanleyLandmarkDH01093-0	2407300	95.18	2078677	86.35	0.05	0.04	150
StanleyLandmarkDH01095-0	2407300	94.79	2075466	86.22	0.05	0.04	150
StanleyLandmarkDH01097-0	2407300	92.2	1966990	81.71	0.05	0.038	150
StanleyLandmarkDH01099-0	2407300	92.21	1978264	82.18	0.05	0.038	150
StanleyLandmarkDH01100-0	2407300	94.5	2074749	86.19	0.05	0.04	150
StanleyLandmarkDH01103-0	2407300	94.49	2076259	86.25	0.05	0.04	150
StanleyLandmarkDH01106-0	2407300	94.51	2069922	85.99	0.05	0.04	150
StanleyLandmarkDH01108-0	2407300	93.94	2036501	84.6	0.05	0.039	150
StanleyLandmarkDH01111-0	2407300	94.23	2046944	85.03	0.05	0.04	150
StanleyLandmarkDH02001-0	2407300	95.11	2081542	86.47	0.05	0.04	150
StanleyLandmarkDH02007-0	2407300	94.19	2044782	84.94	0.05	0.04	150
StanleyLandmarkDH02008-0	2407300	94.31	2054912	85.36	0.05	0.04	150
StanleyLandmarkDH02009-0	2407300	94.69	2071124	86.04	0.05	0.04	150
StanleyLandmarkDH02014-0	2407300	93.39	2017139	83.79	0.05	0.039	150
StanleyLandmarkDH02017-0	2407300	94.12	2025876	84.16	0.05	0.039	150
StanleyLandmarkDH02024-0	2407300	94.44	2064135	85.74	0.05	0.04	150
StanleyLandmarkDH02045-0	2407300	94.81	2070312	86	0.05	0.04	150
StanleyLandmarkDH01002-0	481460	94.98	414715	86.14	0.01	0.008	150
StanleyLandmarkDH01003-0	481460	94.61	413333	85.85	0.01	0.008	150
StanleyLandmarkDH01011-0	481460	95.3	417366	86.69	0.01	0.008	150
StanleyLandmarkDH01018-0	481460	95.77	420275	87.29	0.01	0.008	150
StanleyLandmarkDH01021-0	481460	94.82	413418	85.87	0.01	0.008	150
StanleyLandmarkDH01027-0	481460	95.38	418057	86.83	0.01	0.008	150
StanleyLandmarkDH01029-0	481460	95.47	417625	86.74	0.01	0.008	150
StanleyLandmarkDH01031-0	481460	95.36	418298	86.88	0.01	0.008	150
StanleyLandmarkDH01035-0	481460	94.34	412777	85.73	0.01	0.008	150
StanleyLandmarkDH01036-0	481460	94.01	408311	84.81	0.01	0.008	150
StanleyLandmarkDH01037-0	481460	94.4	413138	85.81	0.01	0.008	150
StanleyLandmarkDH01038-0	481460	94.01	408313	84.81	0.01	0.008	150
StanleyLandmarkDH01052-0	481460	95.37	418593	86.94	0.01	0.008	150
StanleyLandmarkDH01053-0	481460	95.15	416733	86.56	0.01	0.008	150
StanleyLandmarkDH01056-0	481460	95.2	416700	86.55	0.01	0.008	150
StanleyLandmarkDH01058-0	481460	95.68	419207	87.07	0.01	0.008	150
StanleyLandmarkDH01060-0	481460	94.99	414590	86.11	0.01	0.008	150
StanleyLandmarkDH01061-0	481460	93.88	406364	84.4	0.01	0.008	150
StanleyLandmarkDH01062-0	481460	93.64	406609	84.45	0.01	0.008	150
StanleyLandmarkDH01063-0	481460	94.48	414540	86.1	0.01	0.008	150
StanleyLandmarkDH01064-0	481460	94.18	407725	84.69	0.01	0.008	150
StanleyLandmarkDH01065-0	481460	95.17	416034	86.41	0.01	0.008	150
StanleyLandmarkDH01067-0	481460	94.91	414613	86.12	0.01	0.008	150
StanleyLandmarkDH01068-0	481460	95.12	412637	85.71	0.01	0.008	150
StanleyLandmarkDH01069-0	481460	95.15	415650	86.33	0.01	0.008	150
StanleyLandmarkDH01070-0	481460	94.1	410818	85.33	0.01	0.008	150
StanleyLandmarkDH01072-0	481460	92.55	393962	81.83	0.01	0.008	150
StanleyLandmarkDH01076-0	481460	94.59	413986	85.99	0.01	0.008	150
StanleyLandmarkDH01082-0	481460	94.08	407852	84.71	0.01	0.008	150
StanleyLandmarkDH01083-0	481460	94.97	415255	86.25	0.01	0.008	150
StanleyLandmarkDH01092-0	481460	95.14	416236	86.45	0.01	0.008	150
StanleyLandmarkDH01093-0	481460	95.18	415559	86.31	0.01	0.008	150
StanleyLandmarkDH01095-0	481460	94.83	415661	86.33	0.01	0.008	150
StanleyLandmarkDH01097-0	481460	92.18	392993	81.63	0.01	0.008	150
StanleyLandmarkDH01099-0	481460	92.24	395412	82.13	0.01	0.008	150
StanleyLandmarkDH01100-0	481460	94.44	414603	86.11	0.01	0.008	150
StanleyLandmarkDH01103-0	481460	94.5	415253	86.25	0.01	0.008	150
StanleyLandmarkDH01106-0	481460	94.5	414101	86.01	0.01	0.008	150
StanleyLandmarkDH01108-0	481460	93.97	407133	84.56	0.01	0.008	150
StanleyLandmarkDH01111-0	481460	94.22	409411	85.04	0.01	0.008	150
StanleyLandmarkDH02001-0	481460	95.12	416282	86.46	0.01	0.008	150
StanleyLandmarkDH02007-0	481460	94.16	408819	84.91	0.01	0.008	150
StanleyLandmarkDH02008-0	481460	94.29	410946	85.35	0.01	0.008	150
StanleyLandmarkDH02009-0	481460	94.7	414063	86	0.01	0.008	150
StanleyLandmarkDH02014-0	481460	93.41	403202	83.75	0.01	0.008	150
StanleyLandmarkDH02017-0	481460	94.07	404857	84.09	0.01	0.008	150
StanleyLandmarkDH02024-0	481460	94.47	413088	85.8	0.01	0.008	150
StanleyLandmarkDH02045-0	481460	94.78	413977	85.98	0.01	0.008	150
